# Supplementary material
Source: publisher site journal article supplement (https://www.dovepress.com/article/445474)
Supplement: Supplementary file 1 [file get_supplementary_file.php]

**Supplementary Materials**

**Table S1 Medications affecting surgery and approximate duration of discontinuation before surgery, examinations, and biopsies**

| Effect | Medications | Approximate duration of discontinuation before surgery, examinations, and biopsies (days) |
| --- | --- | --- |
| Antiplatelet | Prasugrel Hydrochloride | ≥14 |
| Clopidogrel Sulfate | 10–14 |
| Ticlopidine Hydrochloride |
| Ethyl Icosapentate | 7–10 |
| Aspirin |
| Ticagrelor | ≥5 |
| Beraprost | 1–4 |
| Cilostazol | 2 |
| Sarpogrelate Hydrochloride | 1 |
| Limaprost Alfadex |
| Anticoagulant | Warfarin Potassium | 5–7 |
| Heparin Sodium (injection) | Neutralize with Protamine Sulfate |
| Heparin Calcium (injection) |
| Dalteparin Sodium (injection) |
| Inhibition of coagulation factor x activity | Apixaban | 1–2 |
| Rivaroxaban | ≥1 |
| Edoxaban |
| Inhibition of thrombin formation | Dabigatran Etexilate Methanesulfonate | 1–2 |
| Argatroban Hydrate (injection) | 0.25 (6 h) |
| Improvement of cerebral blood circulation | Ibudilast | 3 |
| Nicergoline | 2 |
| Ifenprodil Tartrate |
| Improvement of coronary blood flow | Dipyridamole | 1–2 |
| Dilazep Hydrochloride Hydrate | 2 |
| Trapidil |

**Notes:** The duration of medication discontinuation was determined by Kitasato University Hospital. The duration of medication discontinuation was decided by the doctor, considering the patient’s general condition and degree of infiltration and bleeding due to surgery, examination, or biopsy.

**Table S2 Multivariate binary logistic regression analysis of risk factors for medication non-adherence affecting surgery adjusted for age with the interquartile range of this study (n = 1,132)**

| Risk factor | Odds ratio (95% CI) | p |
| --- | --- | --- |
| Age |  |  |
| <68 years | 1 (ref) |  |
| ≥68 to <80 years | 1.50 (0.94–2.41) | 0.092 |
| ≥80 years | 1.38 (0.78–2.47) | 0.271 |
| Sex |  |  |
| Male | 1 (ref) |  |
| Female | 0.77 (0.51–1.15) | 0.204 |
| Explainer |  |  |
| Pharmacist | 1 (ref) |  |
| Non-pharmacist | 1.34 (0.91–1.97) | 0.139 |
| Medications | | |
| One | 1 (ref) |  |
| Two or more | 1.65 (1.11–2.44) | 0.012 a |
| Days until surgery |  |  |
| <15 | 1 (ref) |  |
| ≥15 | 1.40 (0.90–2.19) | 0.135 |

**Notes:** a Significant (p < 0.05)

Abbreviations: CI, confidence interval; ref, reference

**Table S3 Multivariate binary logistic regression analysis of risk factors for medication non-adherence affecting surgery across three groups of days from explanation to surgery (n = 1,132)**

| Risk factor | Odds ratio (95% CI) | p |
| --- | --- | --- |
| Age |  |  |
| <65 years | 1 (ref) |  |
| ≥65 years | 1.52 (0.91–2.54) | 0.110 |
| Sex |  |  |
| Male | 1 (ref) |  |
| Female | 0.76 (0.51–1.14) | 0.187 |
| Explainer |  |  |
| Pharmacist | 1 (ref) |  |
| Non-pharmacist | 1.25 (0.82–1.92) | 0.305 |
| Medications |  |  |
| One | 1 (ref) |  |
| Two or more | 1.67 (1.13–2.47) | 0.010 a |
| Days until surgery |  |  |
| <15 | 1 (ref) |  |
| ≥15 to <30 | 1.34 (0.83–2.14) | 0.229 |
| ≥30 | 1.57 (0.92–2.68) | 0.099 |

**Notes:** a Significant (p < 0.05)

Abbreviations: CI, confidence interval; ref, reference

**Table S4 Multivariate binary logistic regression analysis of risk factors for medication non-adherence affecting surgery adjusted for days from explanation to surgery (n = 1,132)**

| Risk factor | Odds ratio (95% CI) | p |
| --- | --- | --- |
| Age |  |  |
| <65 years | 1 (ref) |  |
| ≥65 years | 1.52 (0.91–2.55) | 0.108 |
| Sex |  |  |
| Male | 1 (ref) |  |
| Female | 0.75 (0.50–1.12) | 0.161 |
| Explainer |  |  |
| Pharmacist | 1 (ref) |  |
| Non-pharmacist | 1.29 (0.84–1.97) | 0.247 |
| Medications | | |
| One | 1 (ref) | 1 (ref) |
| Two or more | 1.65 (1.12–2.44) | 0.012 a |
| Days until surgery |  |  |
| <30 | 1 (ref) |  |
| ≥30 | 1.29 (0.84–1.98) | 0.237 |

**Notes:** a Significant (p < 0.05)

Abbreviations: CI, confidence interval; ref, reference

**Figure S1** Non-adherence rate according to medications potentially affecting surgery (n = 1,132). Data are presented as the non-adherence rate (%) and the corresponding 95% CI. As the number of medications increased, the non-adherence rate also increased linearly. The Cochran–Armitage trend has a p-value of 0.003. Abbreviations: CI, confidence interval
